# Supplementary material
Source: Springer Nature journal article supplement (https://www.springermedizin.de/resource/supplementary/12879_2011_1905_MOESM2_ESM.pdf/9444008)
Supplement: MOESM2 [file 9444008]

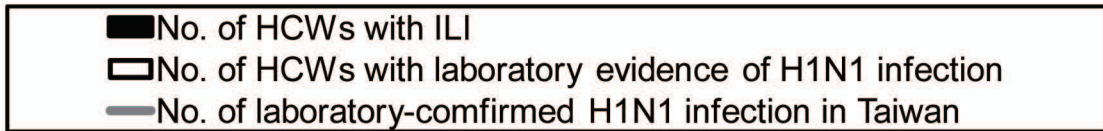

Numbers of health care workers (HCWs)  
 with influenza like illness (ILI) or  
 laboratory evidence of H1N1 infection /month

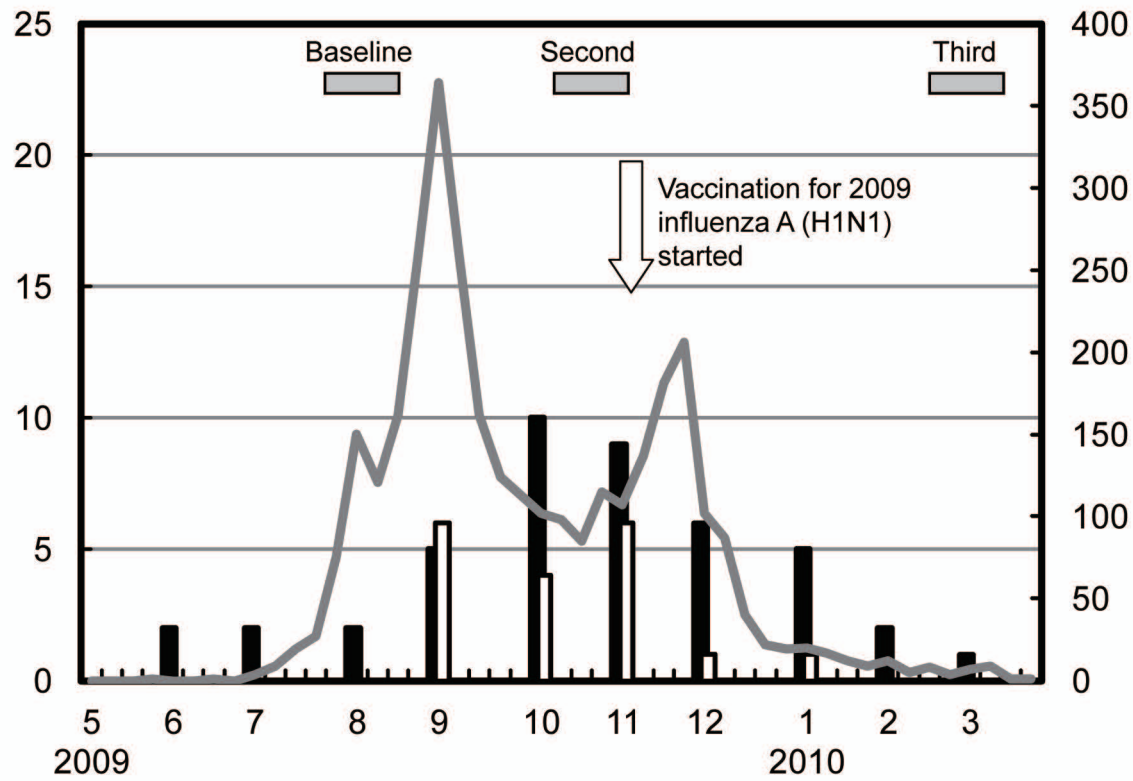

Number of confirmed H1N1  
 infection /week in Taiwan

Year and Month
